# Supplementary material for: The rhesus macaque as a success story of the Anthropocene
Source: eLife journal article supplement (doi:10.7554/elife.78169), 2022-07-08
Supplement: supp [file elife-78169-supp-v1.zip]

Archive with 1 entries (1 files):
- elife_poa_e78169_Transparent_Reporting_File.pdf
